# Supplementary material for: A Mediterranean Diet Mix Has Chemopreventive Effects in a Murine Model of Colorectal Cancer Modulating Apoptosis and the Gut Microbiota
Source: PubMed Central journal article supplement (PMC6423077; doi:10.3389/fonc.2019.00140), 2019-03-12

# A Mediterranean Diet mix has chemopreventive effects in a murine model of colorectal cancer modulating apoptosis and the gut microbiota

Giulia Piazzì<sup>1,2#</sup>, Anna Prossomariti<sup>1,2#</sup>, Maurizio Baldassarre<sup>1,2</sup>, Claudio Montagna<sup>1,2</sup>, Paola Vitaglione<sup>3</sup>, Vincenzo Fogliano<sup>4</sup>, Elena Biagi<sup>5</sup>, Marco Candela<sup>5</sup>, Patrizia Brigidi<sup>5</sup>, Tiziana Balbi<sup>6</sup>, Alessandra Munarini<sup>1,2</sup>, Andrea Belluzzi<sup>7</sup>, Milena Pariali<sup>2</sup>, Franco Bazzoli<sup>1</sup>, Luigi Ricciardiello<sup>1\*</sup>

## Material and methods

### Mediterranean Diet Mix composition

The polyphenol profile of the mix of extracts was characterized by liquid chromatography coupled to tandem mass spectrometry (HPLC/MS/MS) analysis. Chromatographic separation was performed using an HPLC equipped with two micro-pumps Series 200 (Perkin Elmer, Norwalk, Connecticut, USA). MS/MS analyses were performed by an API 3000 triple quadrupole mass spectrometer equipped with a TurboIonSpray source (Applied Biosystems, Foster City, California, USA).

### Determination of urinary polyphenols

Urine from mice grouped in the same cage were pooled and 200  $\mu$ L of urine sample were added to 800  $\mu$ L of 0.2% acetic acid and after centrifugation at 16800xg for 5 min at 4°C the solution was loaded onto Oasis HLB (1 mL 30 mg sorbent) cartridges (Waters, USA). Polyphenols were eluted with 1mL of methanol 0.2% in acetic acid. The eluate was dried under a stream of nitrogen, and re-dissolved in 100  $\mu$ L methanol/H<sub>2</sub>O (70:30, v/v) immediately before the High Resolution Mass Spectrometry. Metabolites, including sulfated and glucuronidated compounds, were identified by comparison of their retention times and mass spectrometry data with those of reference compounds if available or assigned using exact mass values up to the fifth decimal digit with mass tolerance  $\pm$  5ppm.

## Tables

**Supplementary Table 1.** Polyphenol content of the mix of extracts and contribution of each dietary component to the final composition

| Dietary components                 | Polyphenols  |                |             |                      |                       |              |
|------------------------------------|--------------|----------------|-------------|----------------------|-----------------------|--------------|
|                                    | Procyanidins | Phenolic acids | Flavonoids  | Hydrolysable tannins | Phenyl ethyl alcohols | Secoiridoids |
| Apple (mM catechin eq)             | 0.16         | 0.52           | 0.32        |                      |                       |              |
| Tomato (mM naringenin eq)          |              | 0.58           | 0.42        |                      |                       |              |
| Walnuts (mM catechin eq)           | 0.26         |                | 0.02        | 0.72                 |                       |              |
| Whole wheat (mM ferulic acid eq)   |              | 1.00           |             |                      |                       |              |
| Olive oil (mM hydroxytyrosol eq)   |              | 0.15           |             |                      | 0.47                  | 0.38         |
| <b>Mix of extracts (mM tot eq)</b> | <b>0.08</b>  | <b>0.46</b>    | <b>0.19</b> | <b>0.11</b>          | <b>0.09</b>           | <b>0.08</b>  |

**Supplementary Table 2.** Composition of the animal diets

| <b>Component</b>                   | <b>HFWD</b> | <b>LFD</b> |
|------------------------------------|-------------|------------|
| Casein (%)                         | 24.5        | 24.5       |
| Corn starch, pre-gelatinized (%)   | 7.8         | 30         |
| Maltodextrin, 10 DE (%)            | 8           | 18         |
| Sucrose (%)                        | 28.319      | 11.949     |
| Cellulose powder (%)               | 1           | 5          |
| L-Cystine (%)                      | 0.3         | 0.3        |
| Vitamin (AIN mod.) premix (%)      | 1           | 1          |
| Mineral & trace element premix (%) | 4           | 4          |
| Choline bitartrate (%)             | 0.25        | 0.25       |
| TBHQ (%)                           | 0.001       | 0.001      |
| Dye (%)                            | 0.03        | optional   |
| Pork lard (%)                      | 22.6        | 0          |
| Soybean oil (%)                    | 2.2         | 5          |
| Crude protein (%)                  | 21.5        | 21.5       |
| Crude fat (%)                      | 24.9        | 5.2        |
| Crude fiber (%)                    | 1           | 5          |
| Crude ash (%)                      | 2.7         | 3.6        |
| Starch (%)                         | 7.5         | 28.9       |
| Sucrose (%)                        | 30.5        | 13.1       |
| NfE (carbohydrates) (%)            | 46.9        | 60.7       |
| Calcium (%)                        | 0.06        | 0.64       |
| Phosphorus (%)                     | 0.42        | 0.43       |
| Vitamin A (IU/Kg)                  | 4           | 4          |
| Vitamin D3 (IU/Kg)                 | 125         | 1          |
| Vitamin E (IU/Kg)                  | 75          | 75         |
| <i>Fatty acids</i>                 |             |            |
| C 12:0 (%)                         | 0.05        | 0.01       |
| C 14:0 (%)                         | 0.32        | 0.02       |
| C 16:0 (%)                         | 5.7         | 0.58       |
| C 18:0 (%)                         | 3.14        | 0.18       |
| C 20:0 (%)                         | 0.08        | 0.02       |
| C 18:1 (%)                         | 10.02       | 1.29       |
| C 18:2 (%)                         | 3.31        | 2.65       |
| C 18:3 (%)                         | 0.35        | 0.29       |
| <i>Physiological fuel value</i>    | 20.8        | 15.7       |
| Protein (Kcal%)                    | 17          | 23         |
| Fat (Kcal%)                        | 45          | 12         |
| Carbohydrates (Kcal%)              | 38          | 65         |

**Supplementary Table 3.** Molecular formula and selected ion for quantified polyphenols

| Compound                                                 | Formula                                           | M-H       |
|----------------------------------------------------------|---------------------------------------------------|-----------|
| Ferulic acid                                             | C <sub>10</sub> H <sub>10</sub> O <sub>4</sub>    | 193.05063 |
| Dihydroferulic acid                                      | C <sub>10</sub> H <sub>12</sub> O <sub>4</sub>    | 195.06628 |
| p-coumaric acid                                          | C <sub>9</sub> H <sub>8</sub> O <sub>3</sub>      | 163.04007 |
| Dihydroferulic acid sulfate                              | C <sub>10</sub> H <sub>12</sub> SO <sub>7</sub>   | 275       |
| Dihydroferulic acid glucuronide                          | C <sub>16</sub> H <sub>20</sub> O <sub>10</sub>   | 371.09837 |
| Chlorogenic acid                                         | C <sub>16</sub> H <sub>18</sub> O <sub>9</sub>    | 353.08781 |
| Caffeic acid glucuronide                                 | C <sub>15</sub> H <sub>16</sub> O <sub>10</sub>   | 355.06707 |
| Caffeic acid sulfate                                     | C <sub>9</sub> H <sub>8</sub> SO <sub>7</sub>     | 258.9918  |
| Dihydrocaffeic acid sulfate                              | C <sub>9</sub> H <sub>10</sub> SO <sub>7</sub>    | 261.00745 |
| Dihydrocaffeic acid glucuronide                          | C <sub>15</sub> H <sub>18</sub> O <sub>10</sub>   | 357.08272 |
| Protocatechuic acid                                      | C <sub>7</sub> H <sub>6</sub> O <sub>4</sub>      | 153.01933 |
| Hippuric acid                                            | C <sub>9</sub> H <sub>9</sub> NO <sub>3</sub>     | 178.05097 |
| Vanillic acid                                            | C <sub>8</sub> H <sub>8</sub> O <sub>4</sub>      | 167.03498 |
| Caffeic acid                                             | C <sub>9</sub> H <sub>8</sub> O <sub>4</sub>      | 179.03498 |
| Dihydrocaffeic acid (3,4-Dihydroxyphenylpropionic acid)  | C <sub>9</sub> H <sub>10</sub> O <sub>4</sub>     | 181.05063 |
| di-HPA acid 3,4-Dihydroxyphenylacetic acid               | C <sub>8</sub> H <sub>8</sub> O <sub>4</sub>      | 167.03498 |
| HPP acid 3-Hydroxyphenylpropionic acid                   | C <sub>9</sub> H <sub>10</sub> O <sub>3</sub>     | 165.05572 |
| Ferulic acid glucuronide                                 | C <sub>16</sub> H <sub>18</sub> O <sub>10</sub>   | 369.08272 |
| Ferulic acid sulfate                                     | C <sub>10</sub> H <sub>10</sub> SO <sub>7</sub>   | 273.00745 |
| 3-HPA acid (3-Hydroxyphenylacetic acid)                  | C <sub>8</sub> H <sub>8</sub> O <sub>3</sub>      | 151.04007 |
| Homovanillic acid (3-Methoxy-4-hydroxyphenylacetic acid) | C <sub>9</sub> H <sub>10</sub> O <sub>4</sub>     | 181.05063 |
| 4-Hydroxybenzoic acid                                    | C <sub>7</sub> H <sub>6</sub> O <sub>3</sub>      | 137.02442 |
| 3-Hydroxybenzoic acid                                    | C <sub>7</sub> H <sub>6</sub> O <sub>3</sub>      | 137.02442 |
| 4-Hydroxyhippuric acid                                   | C <sub>9</sub> H <sub>9</sub> NO <sub>4</sub>     | 194.04588 |
| 3-Hydroxyhippuric acid                                   | C <sub>9</sub> H <sub>9</sub> NO <sub>4</sub>     | 194.04588 |
| Phenylacetic acid                                        | C <sub>8</sub> H <sub>8</sub> O <sub>2</sub>      | 135.04515 |
| Furuloylglycine                                          | C <sub>12</sub> H <sub>13</sub> NO <sub>5</sub>   | 250.0721  |
| Epicatechin                                              | C <sub>15</sub> H <sub>14</sub> O <sub>6</sub>    | 289.07176 |
| Epicatechin glucuronide                                  | C <sub>21</sub> H <sub>22</sub> O <sub>12</sub>   | 465.10385 |
| Epicatechin-O-sulfate                                    | C <sub>15</sub> H <sub>14</sub> O <sub>9</sub> S  | 369.02858 |
| O-methyl-epicatechin-O-glucuronide                       | C <sub>22</sub> H <sub>24</sub> O <sub>12</sub>   | 479.1195  |
| O-methyl-epicatechin-O-sulfate                           | C <sub>16</sub> H <sub>16</sub> O <sub>9</sub> S  | 383.04423 |
| Syringic acid                                            | C <sub>9</sub> H <sub>10</sub> O <sub>5</sub>     | 197.04555 |
| Uro-A glucuronide                                        | C <sub>19</sub> H <sub>16</sub> O <sub>10</sub>   | 403.06707 |
| Uro-B-glucuronide                                        | C <sub>19</sub> H <sub>16</sub> O <sub>9</sub>    | 387.07216 |
| Uro-C glucuronide                                        | C <sub>19</sub> H <sub>16</sub> O <sub>11</sub>   | 419.06198 |
| Uro-C methyl ether glucuronide                           | C <sub>20</sub> H <sub>18</sub> O <sub>11</sub>   | 433.07763 |
| DMEA (dimethyl ellagic acid glucuronide)                 | C <sub>22</sub> H <sub>18</sub> O <sub>14</sub>   | 505.06238 |
| Uro-D glucuronide                                        | C <sub>19</sub> H <sub>16</sub> O <sub>12</sub>   | 435.0569  |
| Uro-A                                                    | C <sub>13</sub> H <sub>8</sub> O <sub>4</sub>     | 227.19332 |
| Uro-B                                                    | C <sub>13</sub> H <sub>8</sub> O <sub>3</sub>     | 211.04007 |
| Uro-C                                                    | C <sub>13</sub> H <sub>8</sub> O <sub>5</sub>     | 243.0299  |
| Sinapinic acid                                           | C <sub>11</sub> H <sub>12</sub> O <sub>5</sub>    | 223.0612  |
| Gallic acid                                              | C <sub>7</sub> H <sub>6</sub> O <sub>5</sub>      | 169.01425 |
| Urolithin D                                              | C <sub>13</sub> H <sub>8</sub> O <sub>6</sub>     | 259.02481 |
| Uro-A sulfate                                            | C <sub>13</sub> H <sub>8</sub> O <sub>7</sub> S   | 306.9918  |
| Urolithin A sulfoglucuronide                             | C <sub>19</sub> H <sub>16</sub> O <sub>13</sub> S | 483.02388 |
| Ellagic acid glucuronide                                 | C <sub>20</sub> H <sub>14</sub> O <sub>18</sub>   | 477.03108 |
| Urolithin D methyl ether glucuronide                     | C <sub>20</sub> H <sub>18</sub> O <sub>12</sub>   | 449.07255 |

**Supplementary Table 4.** Urinary concentration of polyphenols

| Urinary polyphenols (ng/ml)        | Mice arms   |              |             |             |              |              |
|------------------------------------|-------------|--------------|-------------|-------------|--------------|--------------|
|                                    | Healthy LFD | Healthy HFWD | LFD         | LFD-MD-MIX  | HFWD         | HFWD-MD-MIX  |
| Hippuric acid                      | 2050        | 3028         | 3688        | 2861        | 4935         | 9512         |
| 4-Hydroxybenzoic acid              | 201         | 31           | 322         | 167         | 264          | 276          |
| P-coumaric acid                    | 0           | 0            | 5           | 4           | 34           | 16           |
| M-coumaric acid                    | 0           | 0            | 3           | 3           | 7            | 4            |
| Chlorogenic acid                   | 0           | 0            | 0           | 0           | 1            | 0            |
| Dihydrocaffeic acid glucuronide    | 582         | 627          | 116         | 136         | 282          | 479          |
| Ferulic acid glucuronide           | 1619        | 3707         | 1457        | 1440        | 5299         | 5922         |
| Gallic acid                        | 84          | 22           | 629         | 31          | 188          | 265          |
| Siringic acid                      | 918         | 1365         | 367         | 368         | 985          | 1213         |
| Sinapinic acid                     | 175         | 407          | 210         | 345         | 829          | 2481         |
| Epicatechin                        | 0           | 0            | 0           | 0           | 0            | 183          |
| Hydroxyhippuric acid               | 2015        | 2138         | 1209        | 908         | 1803         | 2341         |
| O-methyl-epicatechin-O-glucuronide | 49          | 99           | 384         | 266         | 1047         | 278          |
| Feruloylglycine                    | 2218        | 1735         | 444         | 1222        | 1722         | 1228         |
| <b>Total polyphenols</b>           | <b>9912</b> | <b>13160</b> | <b>8833</b> | <b>7751</b> | <b>17396</b> | <b>24196</b> |

### Figures and figure legends

**Supplementary Figure 1.** Comparison of mice colon length at sacrifice (ANOVA  $p = 0.0056$ ). Data are shown as individual values.  $n=5$  Healthy LFD;  $n=4$  Healthy HFWD;  $n=8$  LFD;  $n=10$  LFD-MD-MIX;  $n=6$  HFWD;  $n=7$  HFWD-MD-MIX. Statistical significance was obtained using one-way two-tailed ANOVA followed by Tukey's post-hoc test. \*  $p < 0.05$  vs. Healthy LFD; \*\*  $p < 0.01$  vs. Healthy LFD.

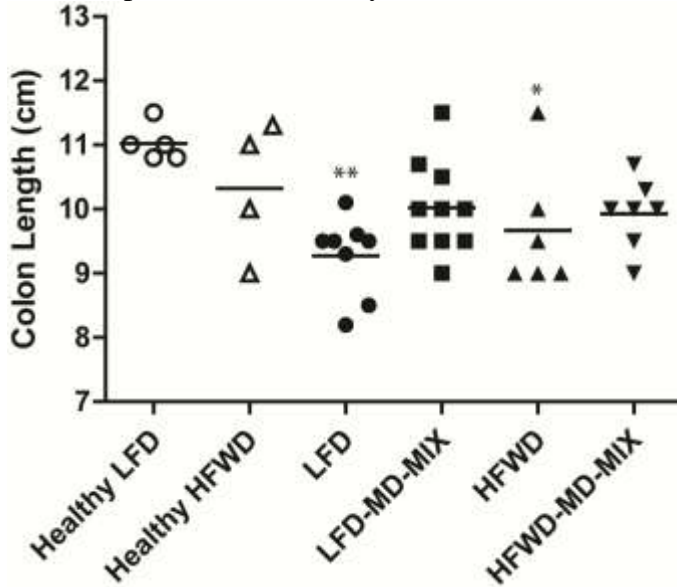

**Supplementary Figure 2.** Mice body weight at sacrifice (ANOVA  $p < 0.0001$ ). Data are shown as individual values.  $n=5$  Healthy LFD;  $n=4$  Healthy HFWD;  $n=8$  LFD;  $n=10$  LFD-MD-MIX;  $n=6$  HFWD;  $n=7$  HFWD-MD-MIX. Statistical significance was obtained using one-way two-tailed ANOVA followed by Tukey's post-hoc test. \*  $p < 0.05$  vs. Healthy LFD; \*\*\*  $p < 0.001$  vs. Healthy LFD; #  $p < 0.05$  vs. Healthy HFWD; ##  $p < 0.01$  vs. Healthy HFWD.

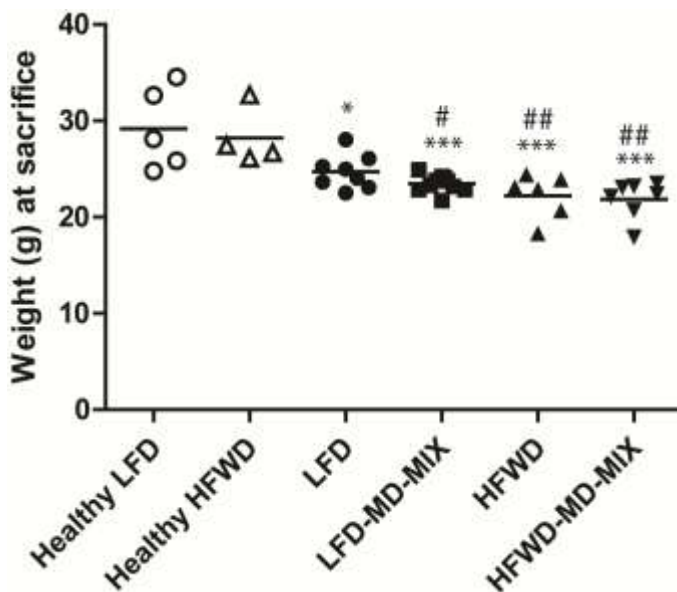

**Supplementary Figure 3.** Apoptosis analysis by q-PCR. Data are plotted as *Bax/Bcl2* ratio. Statistical analysis was performed using one-way two-tailed ANOVA followed by Tukey's post-hoc test. n=5 Healthy LFD; n=4 Healthy HFWD; n=8 LFD; n=10 LFD-MD-MIX; n=6 HFWD; n=7 HFWD-MD-MIX. # p < 0.05 vs. Healthy HFWD; ## p < 0.01 vs. Healthy HFWD.

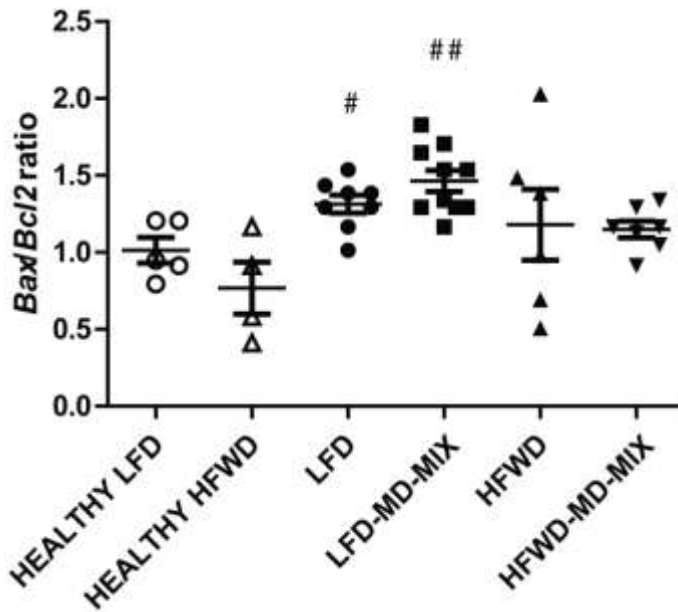

**Supplementary Figure 4.** Ki67 protein analyzed by IHC. Data are plotted as a percentage of Ki67 positive cells/total nuclei. Statistical analysis was performed using one-way two-tailed ANOVA. n=5 Healthy LFD; n=4 Healthy HFWD; n=8 LFD; n=10 LFD-MD-MIX; n=6 HFWD; n=7 HFWD-MD-MIX.

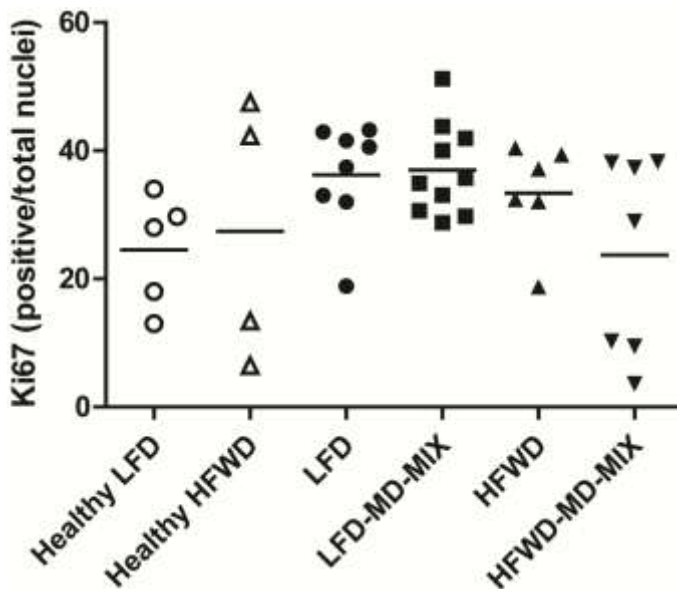

**Supplementary Figure 5.** PCoA based on weighted UniFrac distances among fecal microbiota samples of mice fed with LFD and HFWD diets, at time points T1 (filled circles), T2

(filled triangles) and T3 (filled squares). Healthy mice (upper panel), LFD and HFWD arms (middle panel), LFD-MD-MIX and HFWD-MD-MIX arms (lower panel). PCoA first (MDS1) and second (MDS2) principal components are plotted.

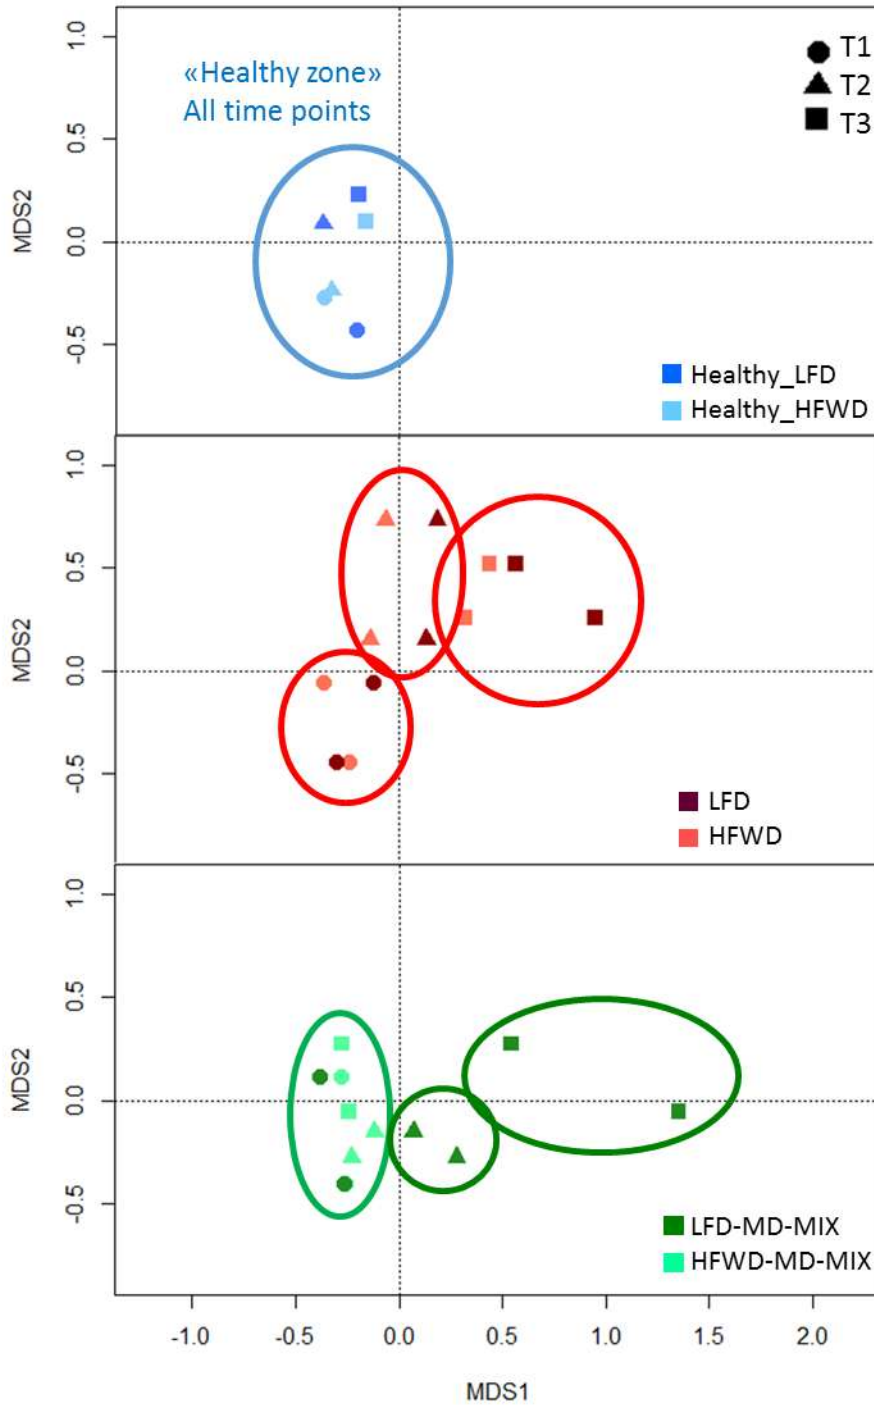

Supplement: Data_Sheet_1.pdf [file Data_Sheet_1.pdf]
